# Supplementary material for: The Diversity, Composition, and Putative Functions of Gill-Associated Bacteria of Bathymodiolin Mussel and Vesicomyid Clam from Haima Cold Seep, South China Sea
Source: MDPI journal article supplement (doi:10.3390/microorganisms8111699), 2020-10-30
Supplement: s1 [file s1]

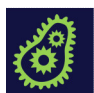

## Supplementary Figures:

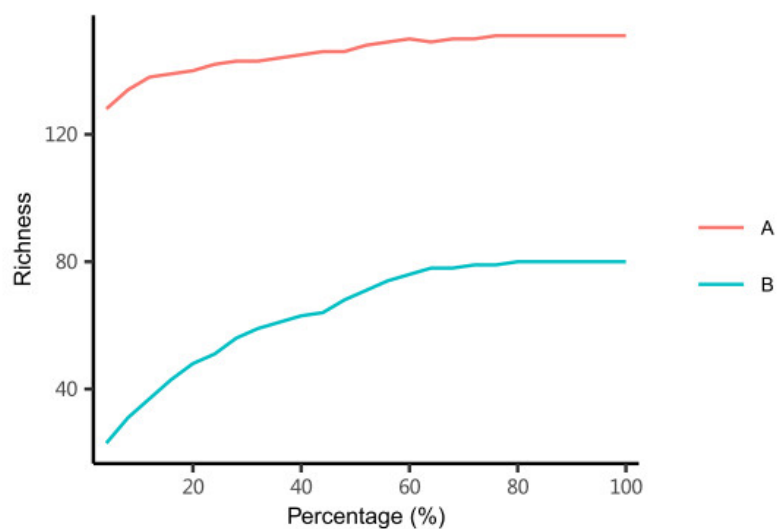

**Figure S1.** Rarefaction curves of detected bacterial species of the gill-associated microbes of *Gigantidas haimaensis* (A) and *Archivesica marissinica* (B).

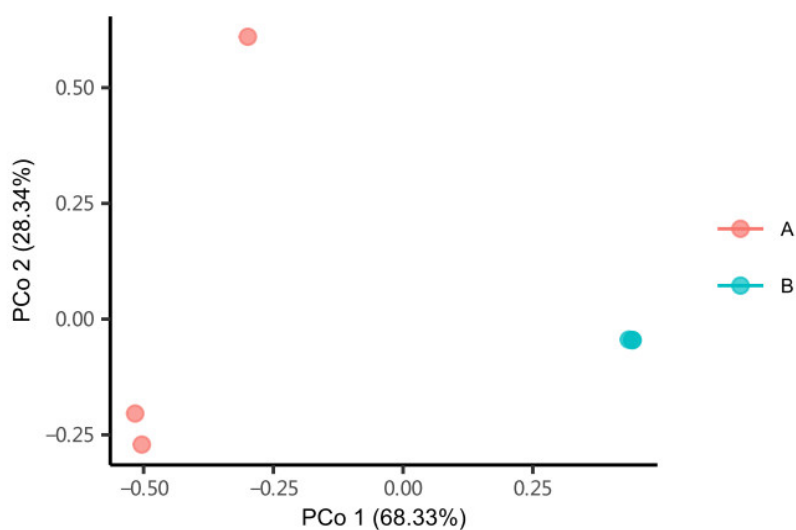

**Figure S2.** The principal component analysis of the gill-associated microbes of *G. haimaensis* (A) and *A. marissinica* (B)

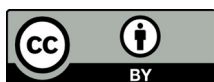

© 2020 by the authors. Licensee MDPI, Basel, Switzerland. This article is an open access article distributed under the terms and conditions of the Creative Commons Attribution (CC BY) license (<http://creativecommons.org/licenses/by/4.0/>).
